# Supplementary material
Source: publisher site journal article supplement (https://www.dovepress.com/article/479965)
Supplement: Supplementary file 1 [file get_supplementary_file.php]

**Supplementary Table 1.** Baseline Characteristics of Patients with or without Carotid Calcification

| **Characteristics** | **Carotid calcification** | | ***P* value** |
| --- | --- | --- | --- |
| **with (*n* =368)** | **without (*n* =233)** |
| Age, years, mean (SD) | 68.4 (8.68) | 59.7 (11.2) | <0.001 |
| Gender, male, n (%) | 249 (67.7) | 158 (67.8) | 0.970 |
| BMI, kg/m2, mean (SD) | 24.8 (3.08) | 25.0 (3.27) | 0.369 |
| Regular physical activity, n (%) | 336 (91.3) | 194 (83.3) | 0.003 |
| Smoking history, n (%) | 178 (48.4) | 119 (51.1) | 0.518 |
| Hypertension history, n (%) | 274 (74.5) | 161 (69.1) | 0.152 |
| Diabetes mellitus history, n (%) | 146 (39.7) | 59 (25.3) | <0.001 |
| Dyslipidemia history, n (%) | 24 (6.52) | 12 (5.15) | 0.490 |
| Atrial fibrillation history, n (%) | 33（9.0） | 16（6.9） | 0.359 |
| Coronary heart disease history, n (%) | 59 (16.0) | 24 (10.3) | 0.047 |
| eGFR, ml/min, median (P25, P75) | 106 (96,116) | 113 (104,124) | <0.001 |
| NLR, median (P25, P75) | 2.15 (1.56,3.19) | 2.13 (1.63,2.79) | 0.647 |
| **TOAST subtypes, n (%)** |  |  | 0.015 |
| Large artery atherosclerosis | 172 (46.7) | 81 (34.8) |  |
| Small vessel occlusion | 148 (40.2) | 113 (48.5) |  |
| Others | 48 (13.0) | 39 (16.7) |  |
| Staple foods, g/d, median (P25, P75) | 622 (489, 807) | 606 (464, 805) | 0.368 |
| Vegetables, g/d, median (P25, P75) | 359 (218, 521) | 391 (256, 560) | 0.058 |
| Fruits, g/d, median (P25, P75) | 102 (31.4, 222) | 140 (67.4, 277) | 0.002 |
| Nuts, g/d, median (P25, P75) | 9.43 (2.36, 25.7) | 10.6 (3.89, 25.5) | 0.125 |
| Meat, g/d, median (P25, P75) | 54.2 (28.4, 91.3) | 62.5 (31.7, 104) | 0.092 |
| Dairy products, g/d | 0.00 (0.00, 3.89) | 0.00 (0.00, 7.07) | 0.347 |
| Supplement Use, n (%) | 39 (10.6) | 24 (10.3) | 0.908 |
| DII, median (P25, P75) | 0.17 (-1.39, 1.97) | -0.55 (-2.37, 1.89) | 0.018 |

SD, standard deviation; BMI, body mass index; NLR, neutrophil to lymphocyte ratio; eGFR, estimated glomerular filtration rate; TOAST, Trial of ORG 10172 Acute Stroke Treatment; DII, Dietary Inflammatory Index.

This table is reproduced from Mou, T, Jia, X, Peng, M, et al., Dietary Flavonoid Intake and Carotid Calcification in Patients with Ischemic Stroke, Cerebrovasc Dis, 2024;53:160-167, with permission from the publisher. Copyright © 2024 Karger Publishers, Basel, Switzerland.
